# Supplementary material for: Improved Functioning and Activity According to the International Classification of Functioning and Disability after Multidisciplinary Telerehabilitation for Post-COVID-19 Condition—A Randomized Control Study
Source: MDPI journal article supplement (doi:10.3390/jcm13040970), 2024-02-08
Supplement: s1 [file s1]

**Supplementary material 1 (S1). ICF codes presented in order according Figures 2-4.**

| <b>Functions</b> |                             | <b>Activities and participation</b> |                               |
|------------------|-----------------------------|-------------------------------------|-------------------------------|
| b4552            | fatigability                | d240                                | handling stress               |
| b130             | energy and drive            | d850                                | remunerative employment       |
| b160             | concentration               | d920                                | recreation and leisure        |
| b1440            | short memory                | d2201                               | completing multiple tasks     |
| b1441            | longterm memory             | d870                                | economic self-sufficiency     |
| b740             | muscle endurance            | d4551                               | climbing stairs               |
| b730             | muscle strength             | d430                                | lifting and carrying objects  |
| b735             | muscles tone functions      | d640                                | doing housework               |
| b710             | mobility of joint functions | d450                                | walking                       |
| b134             | sleep functions             | d4751                               | driving motorized vehicles    |
| b440             | breathing functions         | d470                                | using transportation          |
| b410             | heart functions             | d415                                | maintaining a body position   |
| b152             | emotional functions         | d649                                | make the bed                  |
| b640             | sexual functions            | d750                                | informal social relationships |
| b535             | gastrointestinal functions  | d760                                | family relationships          |
| b2801            | pain body one site          | d540                                | dressing                      |
| b2802            | pain body multiple sites    |                                     |                               |
| b2804            | irradiating pain            |                                     |                               |
| b2800            | widespread pain             |                                     |                               |
| b5500            | body temperature            |                                     |                               |
| b1562            | olfactory functions         |                                     |                               |
| b1563            | gustatory functions         |                                     |                               |

**Supplementary material 2 (S2).** Presentation of content and time of team rehabilitation.

|                                                                                                                                                                                                                                                                                                                                                                                             | Period 1 | Period 2 | Period 3 |
|---------------------------------------------------------------------------------------------------------------------------------------------------------------------------------------------------------------------------------------------------------------------------------------------------------------------------------------------------------------------------------------------|----------|----------|----------|
| 1. Psychoeducation:                                                                                                                                                                                                                                                                                                                                                                         |          |          |          |
| - Clinician: Introduction, presentation of data on the group level, lectures on the central nervous system's regulation of autonomic functions, i.e., cardiovascular and pulmonary, including pathophysiology and treatment of orthostatic intolerance, regulation of sleep, pain pathways, autonomic impact on psychological aspects and restoring autonomic balance by body-mind therapy. | 200 (8)  | 175 (8)  | 205 (7)  |
| - Psychologist: Introduction to ACT, mindfulness, compassion, feeling of discomfort, background on brain regulation of emotions, theoretical background on yoga and relaxation therapies.                                                                                                                                                                                                   | 100 (4)  | 230 (10) | 160 (6)  |
| - Physiotherapist: Introduction and feedback about using the ExorLive application, BORG-scale, pelvis muscular functions for breathing regulation, cognitive-behavioural changes in rehabilitation.                                                                                                                                                                                         | 110 (5)  | 25 (1)   | 70 (3)   |
| - Occupational therapist: ergonomics, ExorLive Go application for ergonomic body positions, pacing.                                                                                                                                                                                                                                                                                         | 135 (6)  | 125 (6)  | 90 (4)   |
| 2. Body-mind therapies:                                                                                                                                                                                                                                                                                                                                                                     |          |          |          |
| Breathing exercises                                                                                                                                                                                                                                                                                                                                                                         | 175 (10) | 235 (12) | 175 (9)  |
| Mindfulness/ACT/compassion exercises                                                                                                                                                                                                                                                                                                                                                        | 275 (14) | 220 (14) | 200 (10) |
| Relaxation                                                                                                                                                                                                                                                                                                                                                                                  | 20 (1)   | 0        | 60 (3)   |
| Body Awareness Therapy                                                                                                                                                                                                                                                                                                                                                                      | 45 (2)   | 50 (2)   | 40 (2)   |
| Yoga and pelvic "root" lock                                                                                                                                                                                                                                                                                                                                                                 | 60 (4)   | 85 (4)   | 75 (4)   |
| Qigong                                                                                                                                                                                                                                                                                                                                                                                      | 215 (11) | 170 (8)  | 140 (8)  |
| Do-In                                                                                                                                                                                                                                                                                                                                                                                       | 30 (2)   | 35 (3)   | 15 (1)   |
| Physical exercises with or without pulse increase                                                                                                                                                                                                                                                                                                                                           | 120 (7)  | 170 (9)  | 60 (3)   |
| Total time in minutes of rehabilitation interventions offered by the team during rehabilitation (according to the team's diary)                                                                                                                                                                                                                                                             | 1605     | 1520     | 1290     |
| Additional time*: 120 minutes. Introduction, presentation (the first day, 80 minutes) and summary of rehabilitation (the last day, 40 minutes)                                                                                                                                                                                                                                              |          |          |          |
| Total time in rehabilitation                                                                                                                                                                                                                                                                                                                                                                | 1725     | 1640     | 1420     |

Period 1: 2021-05-10 – 2021-06-02, period 2: 2021-09-26 – 2021-10-28 and period 3: 2022-05-10 – 2022-06-30

Period 1 and 2: 48 hours per 8-weeks (3 sessions per week, 2 hours per session), breaks/reflexions 45-50 minutes per session. Approximately 1680 minutes of rehabilitation

Period 3: 44 hours per 8-weeks (3 sessions per week, 2 hours per session), breaks 45-50 minutes per session. Approximately 1540 minutes of rehabilitation.

\* Every period had 120 minutes of introductions and presentations by participants on their own (the first day, 80 minutes) and summaries of the rehabilitation period (the last day, 40 minutes)

ACT= Acceptance and Commitment therapy.

**Supplementary material 3 (S3).** Detailed flow chart of the study cohort. No differences have been found between the groups except for age in the final cohorts (independent sample test). Abbreviations: TR= telerehabilitation group; WL= waiting list; BMI= Body Mass Index.

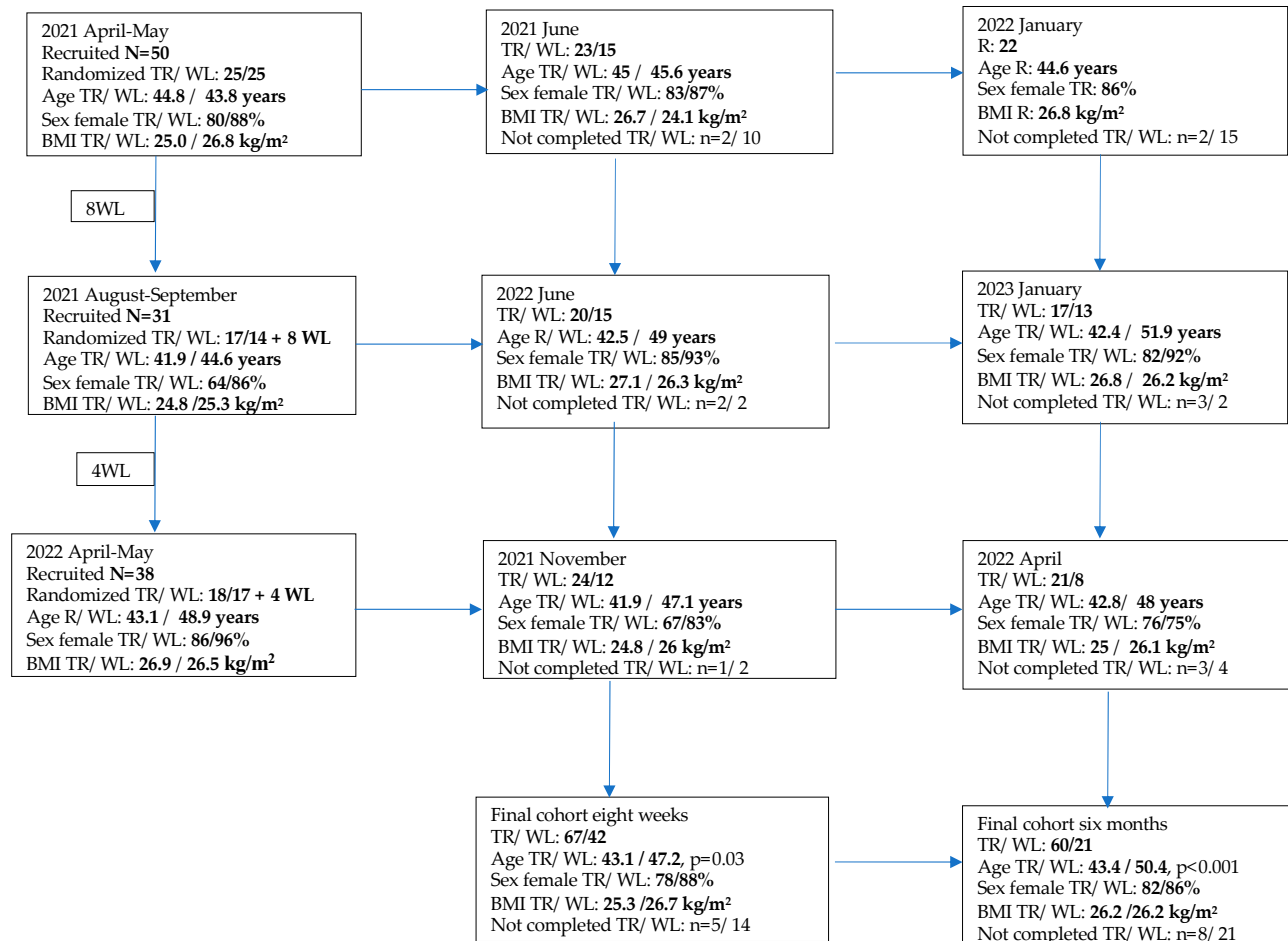

**Supplementary material 4 (S4).** Participants' evaluation of the treatment with the Credibility Expectance Questionnaire (CEQ) after 4 (median 4) and 8 (median 8) weeks of telerehabilitation, presented as median and minimum-maximum values, except for variable CEQ sum). \* indicates significant differences within the group, a non-parametric Wilcoxon signed rank test, \*\*p<0.01 and \*\*\*p<0.001.

| Questions                                                                                      | After 4 weeks<br>telerehabilitation | After 8 weeks<br>telerehabilitation |
|------------------------------------------------------------------------------------------------|-------------------------------------|-------------------------------------|
| 1. How logical does the therapy offered to you seem? (Maximum 9)                               | 8<br>3-9                            | 8<br>5-9                            |
| 2. How successfully do you think this treatment will be reducing in your symptoms? (Maximum 9) | 7<br>3-9                            | 7<br>3-9                            |
| 3. How confident would you be in recommending this treatment to a friend? (Maximum 9)          | 9<br>2-9                            | 9<br>3-9                            |
| 4. How much improvement in your symptoms do you think will occur? (Maximum 100%)               | 50<br>0-100                         | 50**<br>0-100                       |
| 5. How much do you really feel that therapy will help to reduce your symptoms? (Maximum 9)     | 7<br>2-9                            | 7<br>1-9                            |
| 6. How much improvement in your symptoms do you really feel will occur? (Maximum 100%)         | 30<br>0-100                         | 50***<br>0-100                      |
| CEQ sum (in mean and SD)                                                                       | 59 (26)                             | 65 (26) **                          |
